# Supplementary material for: Medicaid Reimbursement for Screening and Brief Intervention for Substance Misuse
Source: Atypon-hosted journal article supplement (doi:10.1176/ps.62.3.pss6203_0306), 2011-03-01
Supplement: Fussell_ds.pdf [file Fussell_ds.pdf]

**Table 1**

State Medicaid status on Healthcare Common Procedure Coding System codes for screening and brief intervention of substance use

| <b>States with codes open for reimbursement</b> | <b>Code(s)</b> | <b>Rate</b>                    | <b>Source</b>             |
|-------------------------------------------------|----------------|--------------------------------|---------------------------|
| Alaska <a href="#">view</a>                     | 99408          | \$59.15                        | Fee schedule              |
|                                                 | 99409          | \$116.60                       |                           |
| Connecticut <a href="#">view</a>                | 99408          | Manually Priced                | Interview, fee schedule   |
|                                                 | 99409          |                                |                           |
| DC                                              | 99408          | \$36.32                        | Fee schedule              |
|                                                 | 99409          | \$71.25                        |                           |
| Idaho <a href="#">view</a>                      | 99408          | \$30.01                        | Fee schedule              |
|                                                 | 99409          | \$58.62                        |                           |
| Indiana <a href="#">view</a>                    | 99408          | \$23.29                        | Fee schedule              |
|                                                 | 99409          | \$45.70                        |                           |
| Iowa <a href="#">view</a>                       | 99408          | \$10                           | Interview, Fee schedule   |
|                                                 | 99409          | \$20                           |                           |
| Maryland <a href="#">view</a>                   | 99408          | N.Fac \$22.27<br>Fac \$21.07   | Fee schedule              |
|                                                 | 99409          | N.Fac \$43.64<br>Fac \$42.44   |                           |
| Massachusetts <a href="#">view</a>              | 99408          | N.Fac \$23.95<br>Fac \$22.67   | Fee schedule              |
|                                                 | 99409          | N.Fac \$46.83<br>Fac \$45.54   |                           |
| Montana <a href="#">view</a>                    | 99408          | Office \$35.16<br>Fac \$33.80  | Interview<br>Fee schedule |
|                                                 | 99409          | Office \$69.24<br>Fac \$67.87  |                           |
| New Jersey <a href="#">view</a>                 | 99408          | N.Spec \$12.93<br>Spec \$15.21 | Interview, Fee schedule   |
|                                                 | 99409          | N.Spec \$25.36<br>Spec \$29.84 |                           |
| North Carolina <a href="#">view</a>             | 99408          | N.Fac \$30.73<br>Fac \$29.46   | Fee schedule              |
|                                                 | 99409          | N.Fac \$60.41<br>Fac \$59.14   |                           |
| Oklahoma                                        | 99408          | \$31.64                        | Interview, Fee schedule   |
|                                                 | 99409          | \$62.28                        |                           |
| Oregon <a href="#">view</a>                     | 99408          | \$23.65                        | Interview, Fee schedule   |
|                                                 | 99409          | \$46.46                        |                           |
| *Rhode Island                                   | 99408          |                                | Interview, Fee schedule   |

|                                     |       |                  |                         |
|-------------------------------------|-------|------------------|-------------------------|
|                                     | 99409 |                  |                         |
| South Carolina <a href="#">view</a> | 99408 | \$27.61          | Fee schedule            |
|                                     | 99409 | \$54.22          |                         |
| *Tennessee                          | H0049 |                  | Interview, Fee schedule |
|                                     | H0050 |                  |                         |
| Utah                                | 99408 | \$22.98          | Fee schedule            |
|                                     | 99409 | \$45.15          |                         |
| Virginia                            | 99408 | See fee schedule | Interview, Fee schedule |
|                                     | 99409 |                  |                         |
| Wisconsin <a href="#">view</a>      | H0049 | See fee schedule | Interview, Fee schedule |
|                                     | H0050 |                  |                         |

| <b>State with Codes Listed: No value assigned</b> |                |                 |               |
|---------------------------------------------------|----------------|-----------------|---------------|
|                                                   | <b>Code(s)</b> | <b>Rate</b>     | <b>Source</b> |
| Colorado                                          | H0049          | On fee schedule | Fee Schedule  |
|                                                   | H0050          | but not open    |               |
| Delaware                                          | 99408          | On fee schedule | Fee Schedule  |
|                                                   | 99409          | but not open    |               |
|                                                   | H0049          |                 |               |
|                                                   | H0050          |                 |               |
| Minnesota                                         | 99408          | On fee schedule | Fee Schedule  |
|                                                   | 99409          | but not open    |               |
|                                                   | H0049          |                 |               |
|                                                   | H0050          |                 |               |
| Mississippi                                       | 99408          | On fee schedule | Fee Schedule  |
|                                                   | 99409          | but not open    |               |
|                                                   | H0049          |                 |               |
|                                                   | H0050          |                 |               |
| Missouri                                          | H0049          | On fee schedule | Fee Schedule  |
|                                                   | H0050          | but not open    |               |
| Nebraska                                          | 99408          | On fee schedule | Fee Schedule  |
|                                                   | 99409          | but not open    |               |
| Washington                                        | 99408          | On fee schedule | Fee Schedule  |
|                                                   | 99409          | but not open    |               |
| West Virginia                                     | 99408          | On fee schedule | Fee Schedule  |
|                                                   | 99409          | but not open    |               |
| Wyoming                                           | 99408          | On fee schedule | Fee Schedule  |
|                                                   | 99409          | but not open    |               |

\*States that indicated codes are open for reimbursement during interviews or public presentations yet web access to payment rates was not available.
